# Supplementary material for: Molecular simulation of conformational transitions in biomolecules using a combination of structure-based potential and empirical valence bond theory
Source: Royal Society of Chemistry journal article supplement (doi:10.1039/b917109f), 2009-01-01
Supplement: b917109f.pdf [file b917109f.pdf]

## Supplementary Material

### Molecular simulation of conformational transitions in biomolecules using a combination of structure-based potential and empirical valence bond theory

Giuseppe de Marco and Péter Várnai

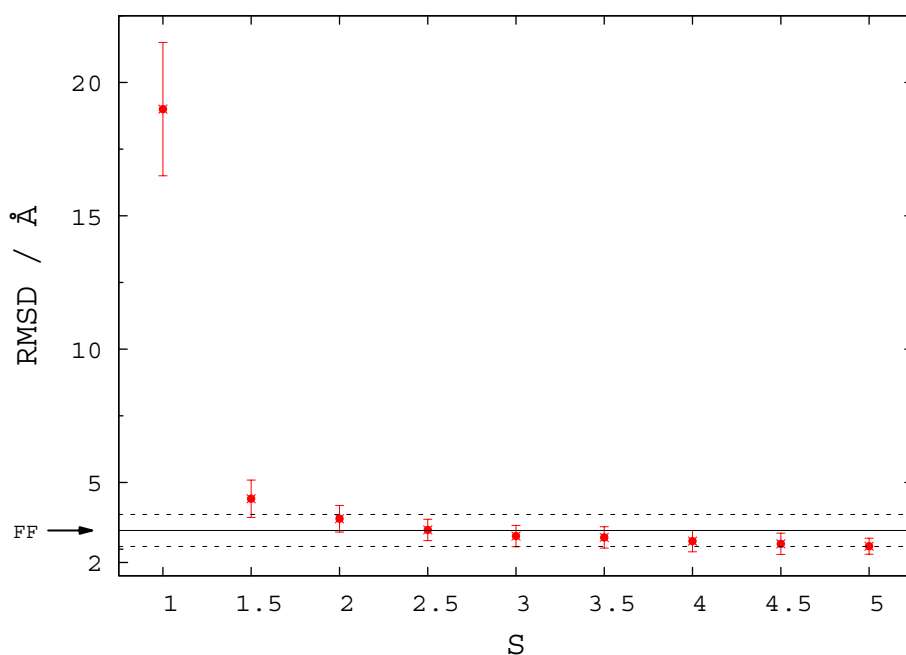

**Figure S1.** Calculated average root mean square deviation (RMSD) of the Cartesian coordinates of all atoms in the DNA duplex from the canonical B-DNA simulated using the structure-based potential with different scaling factors,  $S$ ; error bars indicate one standard deviation from the average. For reference, data using the parmbsc0 force field (FF) is shown as a horizontal solid line with dashed lines indicating one standard deviation from the average.
